# Supplementary material for: RETRACTED: Exosomes From Cancer-Associated Mesenchymal Stem Cells Transmit TMBIM6 to Promote the Malignant Behavior of Hepatocellular Carcinoma via Activating PI3K/AKT Pathway
Source: Frontiers journal article supplement (doi:10.3389/fonc.2022.868726), 2022-06-02
Supplement: Data_Sheet_2.pdf [file Data_Sheet_2.pdf]

## Supplementary Material

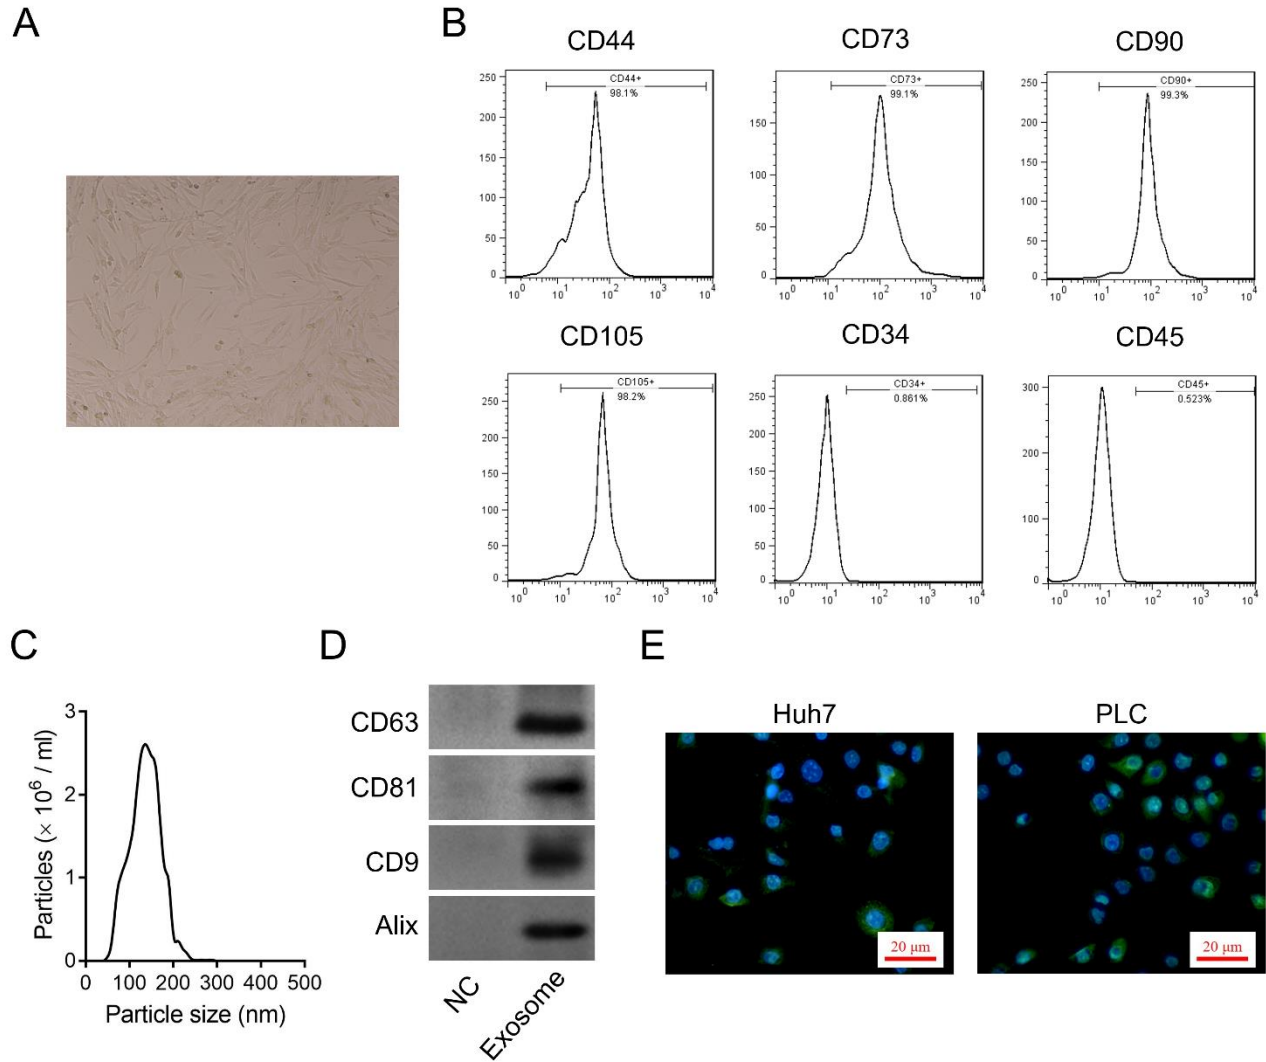

**Supplementary Figure 1.** Characterization of HCC-MSCs and their derived exosomes. HCC-MSCs under bright field (**A**); surface markers of HCC-MSCs (**B**); particle size analysis of HCC-MSCs derived exosomes (**C**); exosome marker analysis (**D**); observation of exosomes absorbed by HCC cells (**E**).

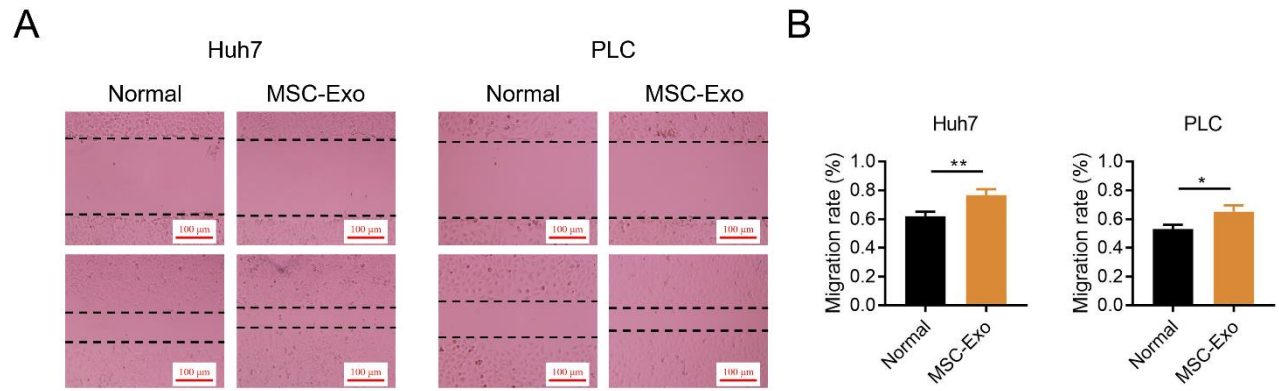

**Supplementary Figure 2.** Effect of HCC-MSCs on migration of HCC cells. Representative images of migration detection (**A**); Comparison of migration rate between groups (**B**).

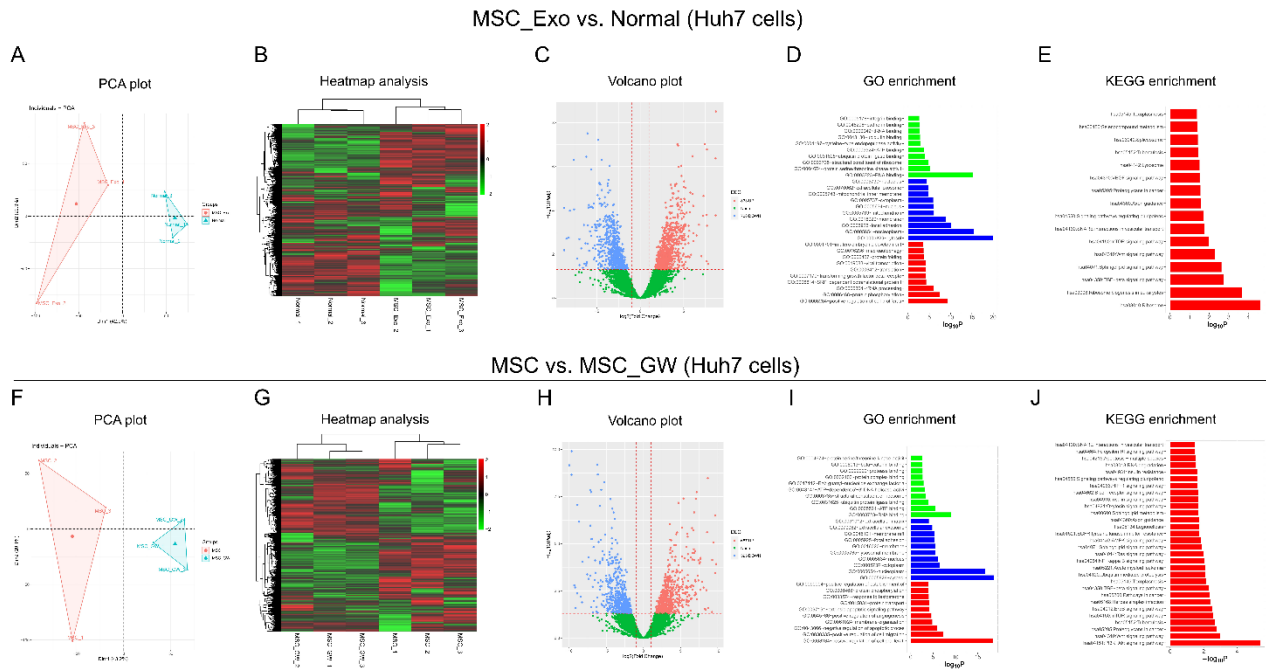

**Supplementary Figure 3.** RNA sequencing in Huh7 cells. PCA (A), heatmap (B) and volcano plot (C) analyses between MSC\_Exo group and normal group; GO (D) and KEGG (E) enrichment of DEGs between MSC\_Exo group and normal group. PCA (F), heatmap (G) and volcano plot (H) analyses between MSC group and MSC\_GW group; GO (I) and KEGG (J) enrichment of DEGs between MSC group and MSC\_GW group.

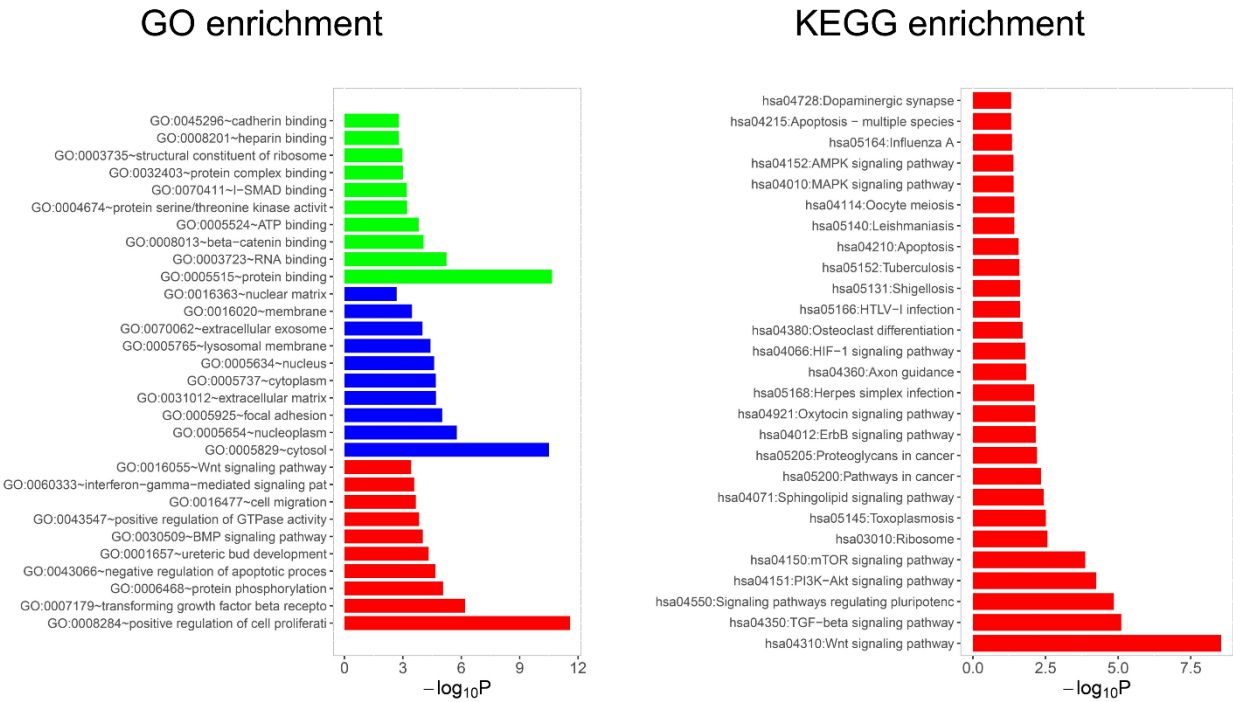

**Supplementary Figure 4.** GO and KEGG enrichment of DEGs between MSC\_Exo versus normal groups and MSC\_GW versus MSC\_GW group.

**Supplementary table 1.** Primers' sequence

| Gene   | Forward Primer (5'-3') | Reverse Primer (5'-3')    |
|--------|------------------------|---------------------------|
| TMBIM6 | AGCAGCACCTGAAGAAGGTC   | TCAATATCAGGGAGCCCAAG      |
| EEF2   | ATGAGGGCAAGATGAAGCTG   | ATGAAGGACGGGATGTTTAC      |
| PRDX1  | TCCCAAGCGCACCATTGCTCA  | CACAGAGCGGCCAACGGGAA      |
| GAPDH  | GAGTCCACTGGCGTCTTCAC   | ATCTTGAGGCTGTTGTCATACTTCT |

**Supplementary table 2.** Antibodies applied in western blot.

| Antibody                  | Company    | Dilution |
|---------------------------|------------|----------|
| <b>Primary Antibody</b>   |            |          |
| CD63 antibody             | Abcam (UK) | 1:1000   |
| CD81 antibody             | Abcam (UK) | 1:1000   |
| CD9 antibody              | Abcam (UK) | 1:2000   |
| Alix antibody             | Abcam (UK) | 1:2000   |
| TMBIM6 antibody           | Abcam (UK) | 1:1000   |
| EEF2 antibody             | Abcam (UK) | 1:1000   |
| PRDX1 antibody            | Abcam (UK) | 1:10000  |
| E-cadherin antibody       | CST (USA)  | 1:1000   |
| N-cadherin antibody       | CST (USA)  | 1:1000   |
| Vimentin antibody         | CST (USA)  | 1:1000   |
| Slug antibody             | CST (USA)  | 1:1000   |
| p-PI3K antibody           | Abcam (UK) | 1:500    |
| PI3K antibody             | Abcam (UK) | 1:1000   |
| p-AKT antibody            | Abcam (UK) | 1:1000   |
| AKT antibody              | Abcam (UK) | 1:1000   |
| GAPDH antibody            | Abcam (UK) | 1:5000   |
| <b>Secondary Antibody</b> |            |          |
| Goat Anti-Rabbit IgG-HRP  | Abcam (UK) | 1:5000   |
